# Supplementary material for: Effects of Different Ionic Polysaccharides in Cooked Lean Pork Batters on Intestinal Health in Mice
Source: MDPI journal article supplement (doi:10.3390/foods11101372), 2022-05-10
Supplement: s1 [file s1]

## Supplementary Materials

### *Prevotellaceae*

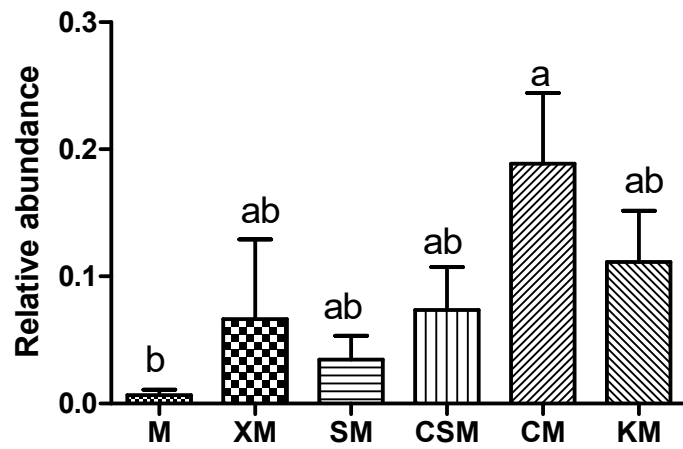

**Figure S1.** Relative abundance of *Prevotellaceae* in response to six dietary groups \*.

\* n=8. Different letters (a,b) above bars represent statistically significant differences ( $p < 0.05$ ). M, XM, SM,

CSM, CM and KM are as described in **Table 1**.

**Table S1.** Colonic tissue parameters of mice in response to six dietary groups \*

| Diet groups | Crypt depth (mm) | Mucousal thickness (mm) | Muscularis thickness (mm) |
|-------------|------------------|-------------------------|---------------------------|
| M           | 0.180±0.022a     | 0.232±0.037b            | 0.114±0.028ab             |
| XM          | 0.158±0.037ab    | 0.231±0.025b            | 0.149±0.029a              |
| SM          | 0.164±0.042ab    | 0.239±0.055ab           | 0.131±0.057ab             |
| CSM         | 0.146±0.024b     | 0.274±0.028a            | 0.095±0.015b              |
| CM          | 0.157±0.014ab    | 0.234±0.040b            | 0.088±0.013b              |
| KM          | 0.178±0.030ab    | 0.238±0.038ab           | 0.137±0.060ab             |

\* n=3, five sections were selected for each tissue section and then were measured. Different letters (a,b) in the same column represent statistically significant differences ( $p < 0.05$ ). M, XM, SM, CSM, CM and KM are as described in **Table 1**.
